# Supplementary material for: Negative Regulatory Loop between Microphthalmia-Associated Transcription Factor (MITF) and Notch Signaling
Source: MDPI journal article supplement (doi:10.3390/ijms20030576), 2019-01-29
Supplement: s1 [file s1]

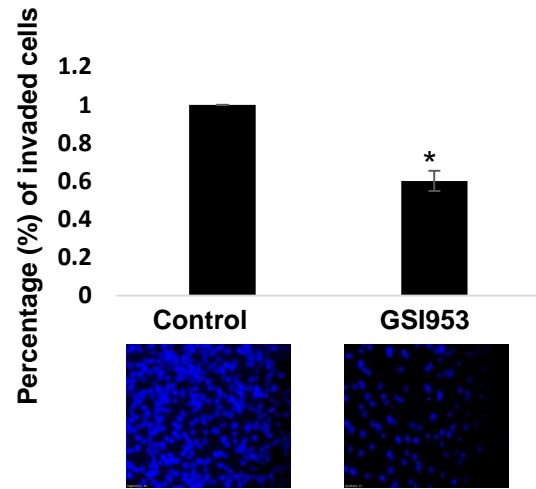

**Supplementary figure S1.** Notch signaling promotes melanoma invasion. WM3314 cells were treated with 20 $\mu$ M PF3084014 and an invasion assay was conducted. Graph demonstrates proportion (%) of invading cells from the total seeded cells, and a representative image of invading cells is shown for each treatment in the lower panel; blue is DAPI nuclear staining. Error bars represent  $\pm$  SEM, \* indicates  $p < 0.05$  ( $n = 4$ ).
